# Supplementary material
Source: PubMed Central journal article supplement (PMC3740971)

**A**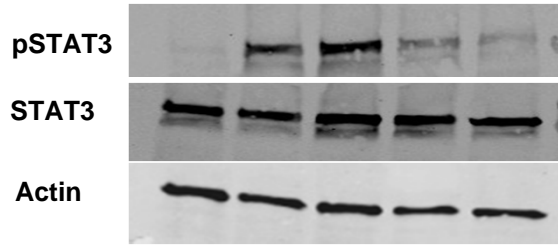

|             |   |   |   |   |   |
|-------------|---|---|---|---|---|
| IL-6        | - | + | + | + | + |
| sIL-6R      | - | - | + | - | + |
| Tocilizumab | - | - | - | + | + |

**B**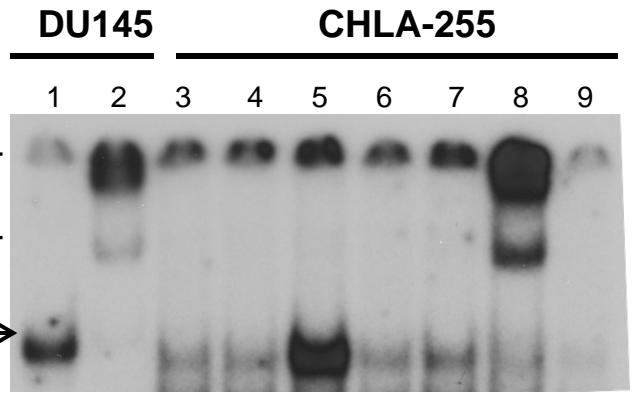

|             |   |   |   |   |   |   |   |   |   |
|-------------|---|---|---|---|---|---|---|---|---|
| IL-6        | - | - | - | + | + | + | + | + | + |
| sIL-6R      | - | - | - | - | + | - | + | + | - |
| Tocilizumab | - | - | - | - | - | + | + | - | + |
| αSTAT3ab    | - | + | - | - | - | - | - | + | - |

**C**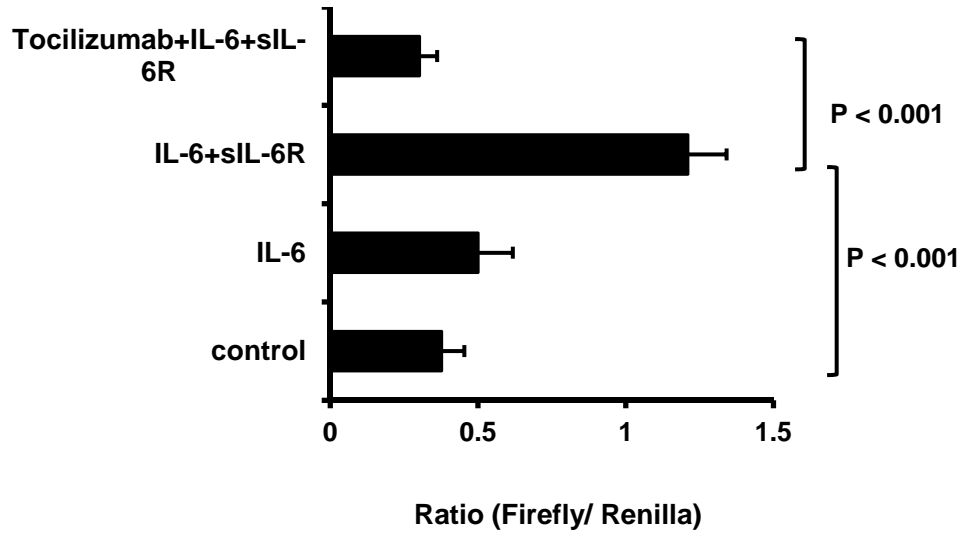

Supplement: NIHMS472931-supplement-2.pdf [file NIHMS472931-supplement-2.pdf]
